# Supplementary material
Source: PubMed Central journal article supplement (PMC4378147)
Supplement: supp_pp.114.251751_251751revSupporting_Figures_and_Tables.pdf [file supp_pp.114.251751_251751revSupporting_Figures_and_Tables.pdf]

## Supporting Information

Supplemental Figure S1: Imaging table used for photographing the root systems of maize.

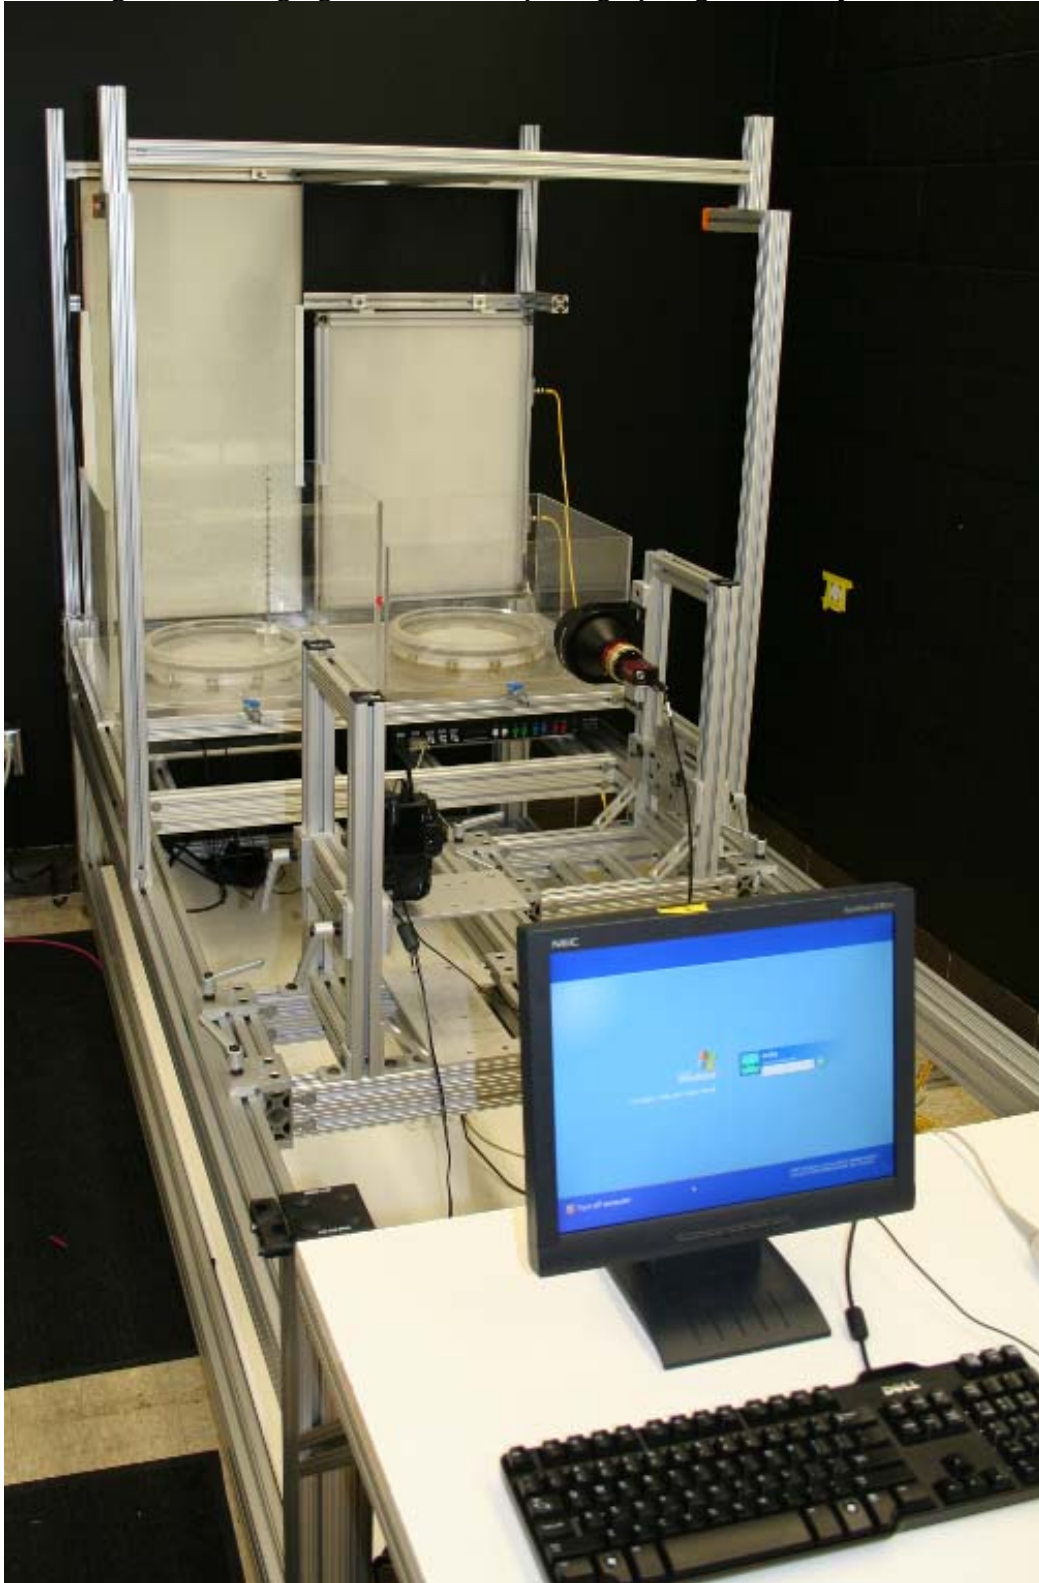

Supplemental Figure S2: Representative image of each NAM founder for day 9. The scale bar represents a scale of 1 centimeter. All images are presented at the same scale.

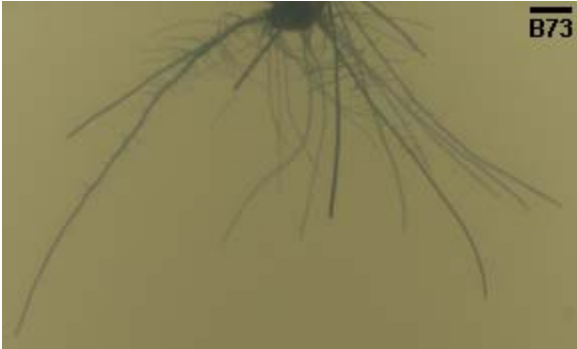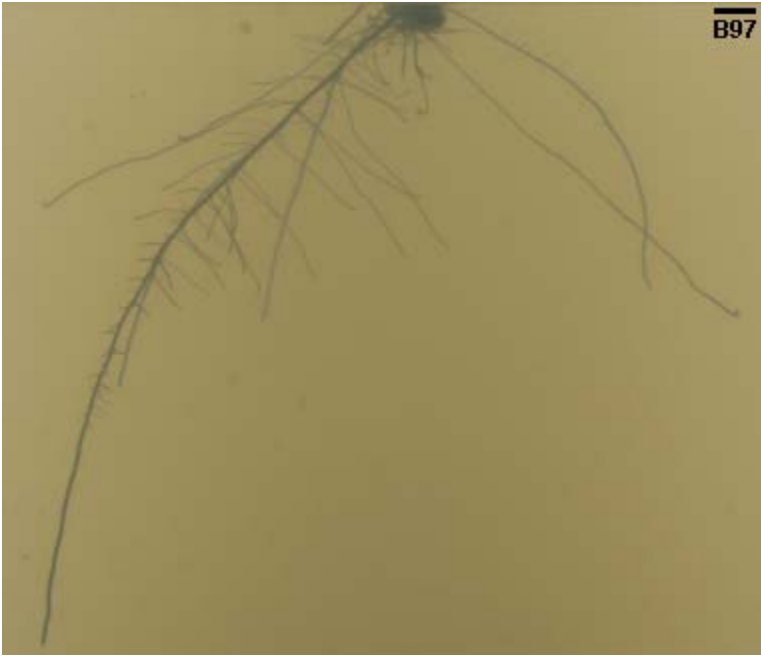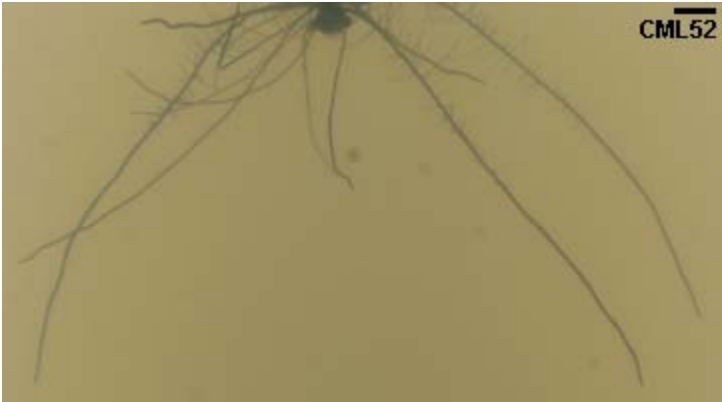

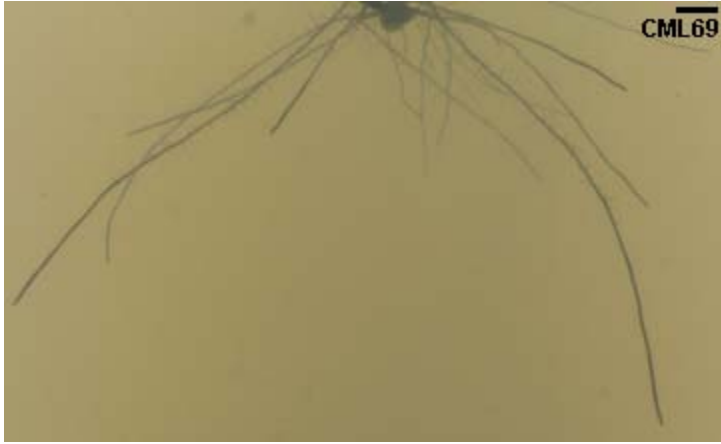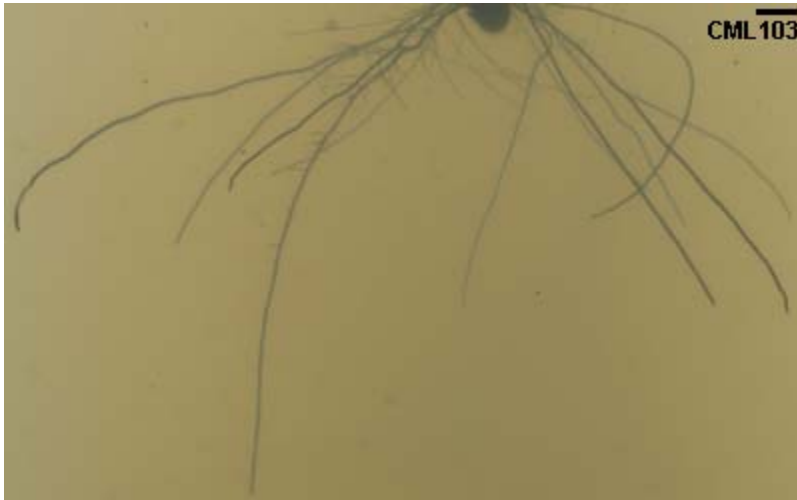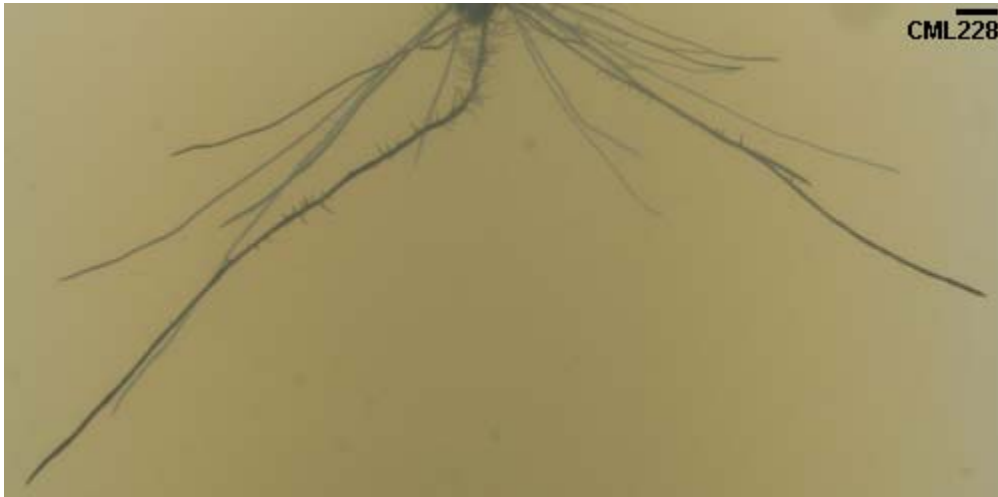

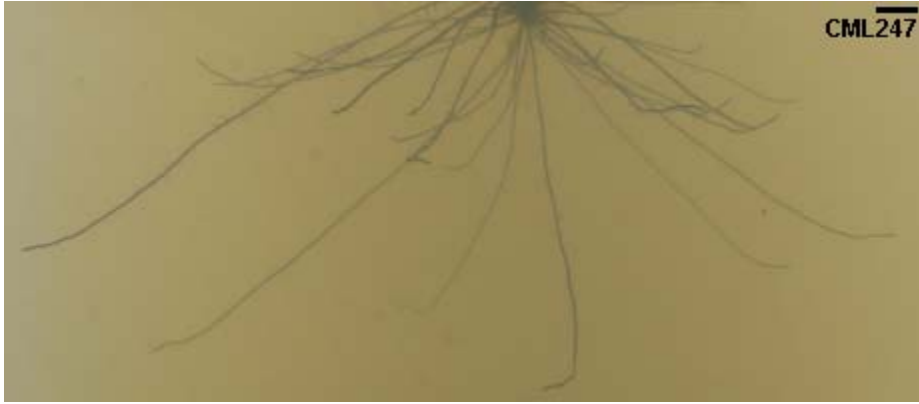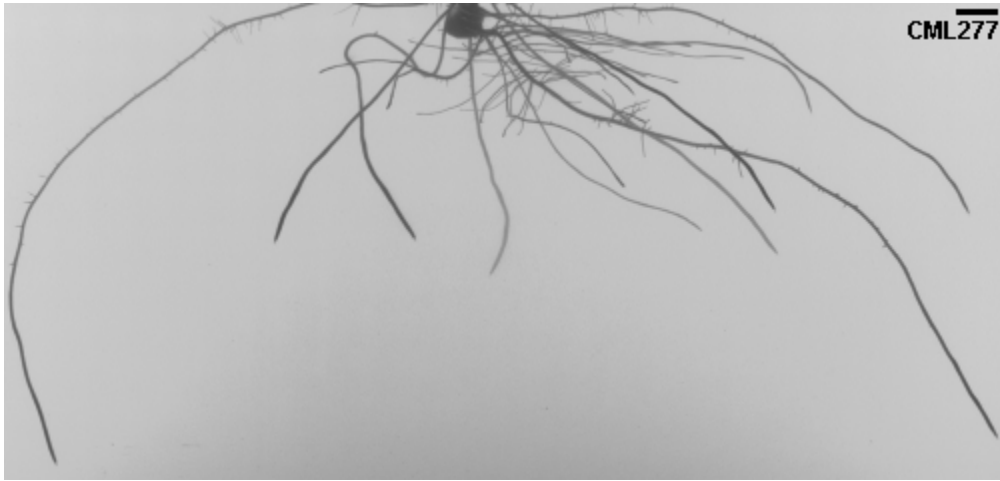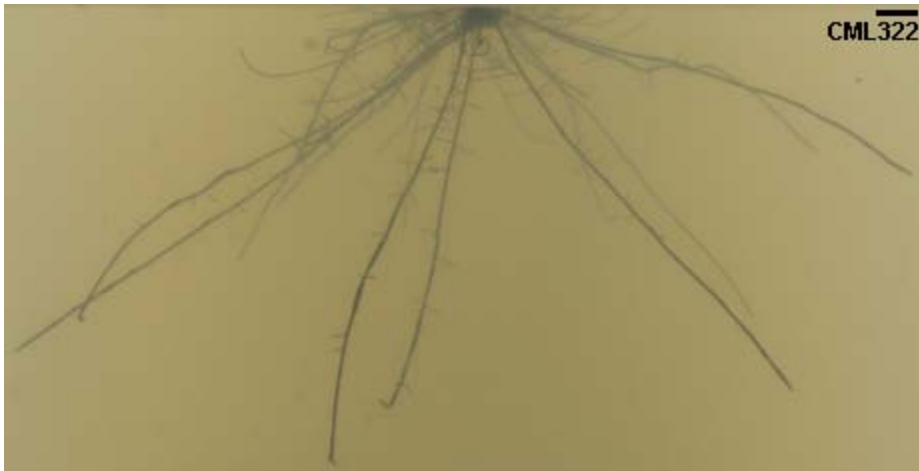

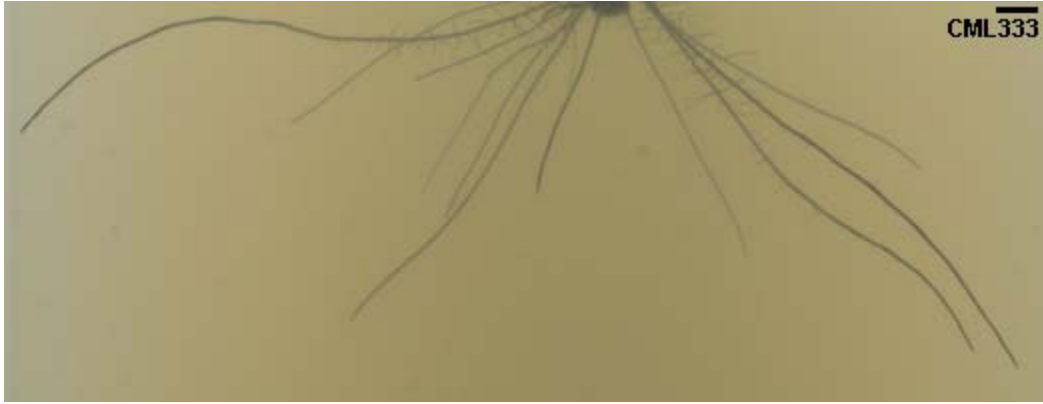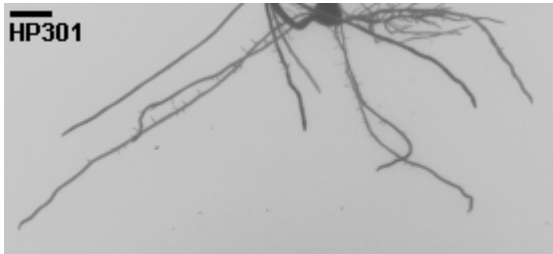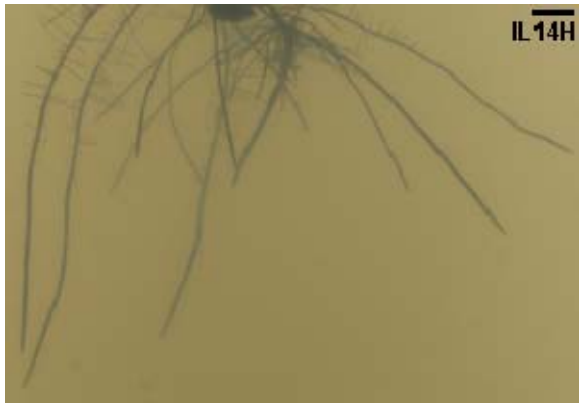

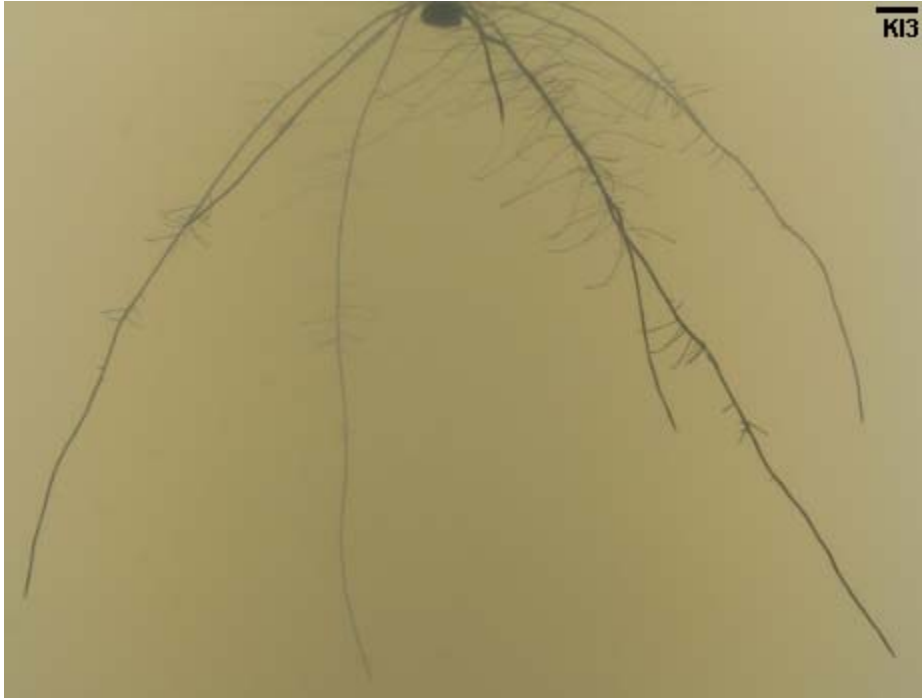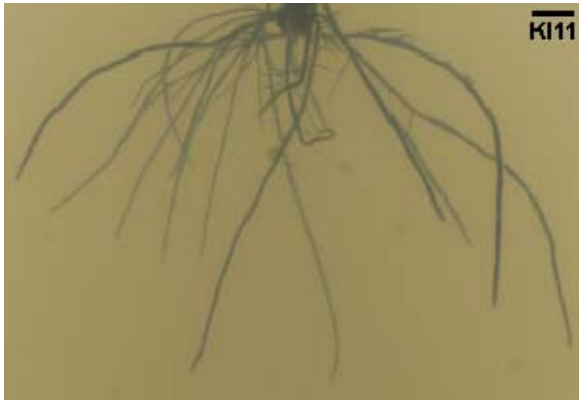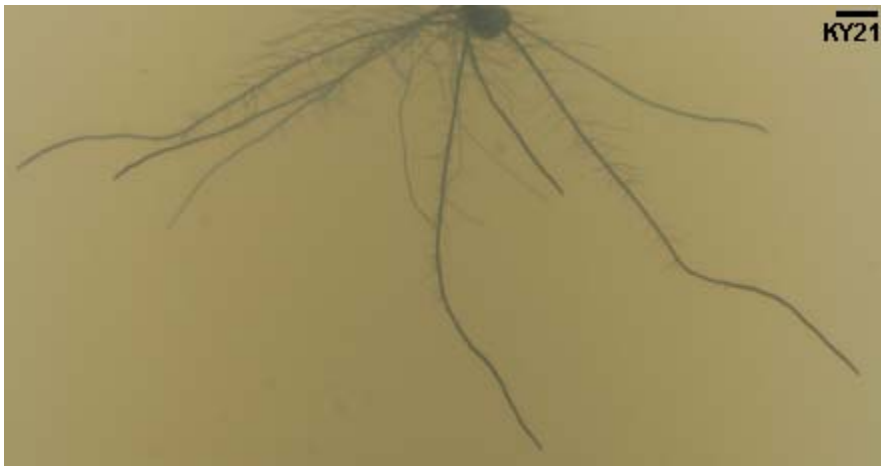

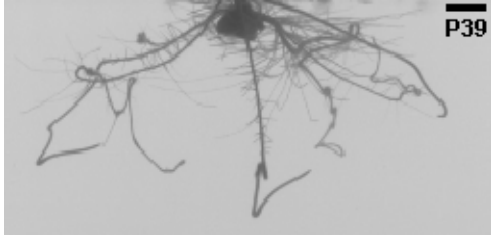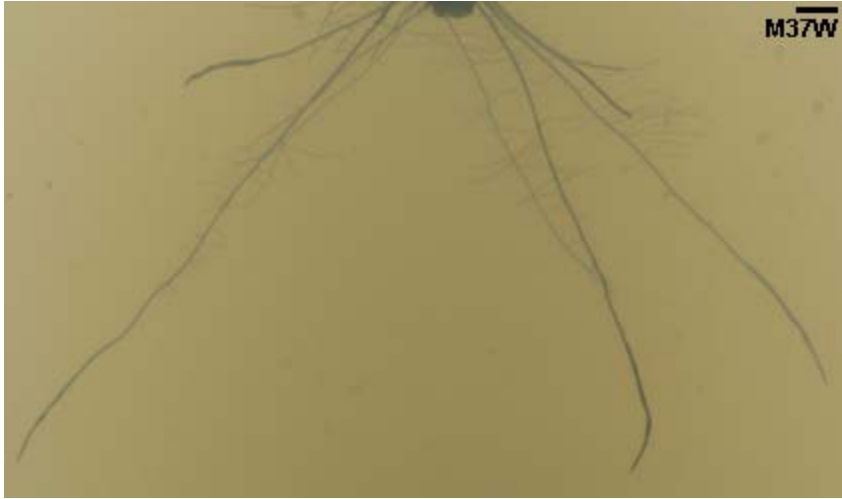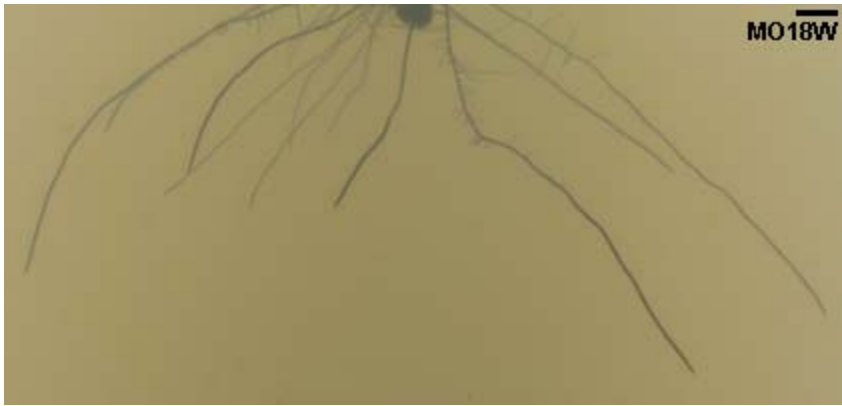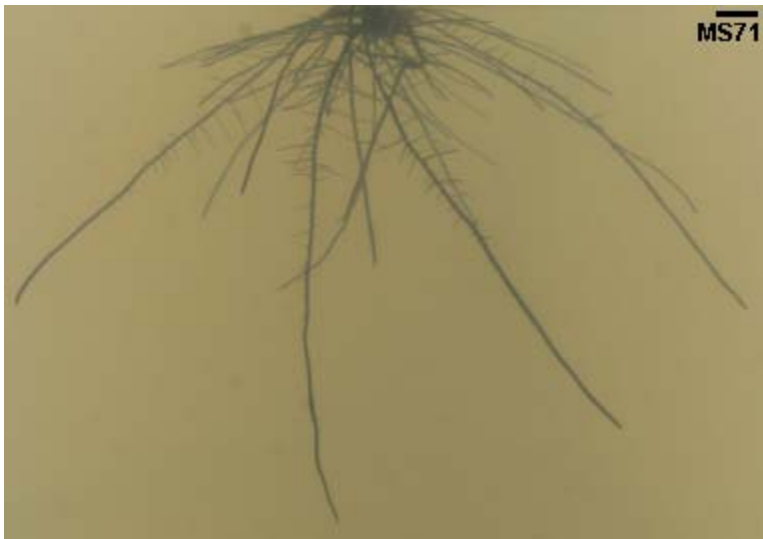

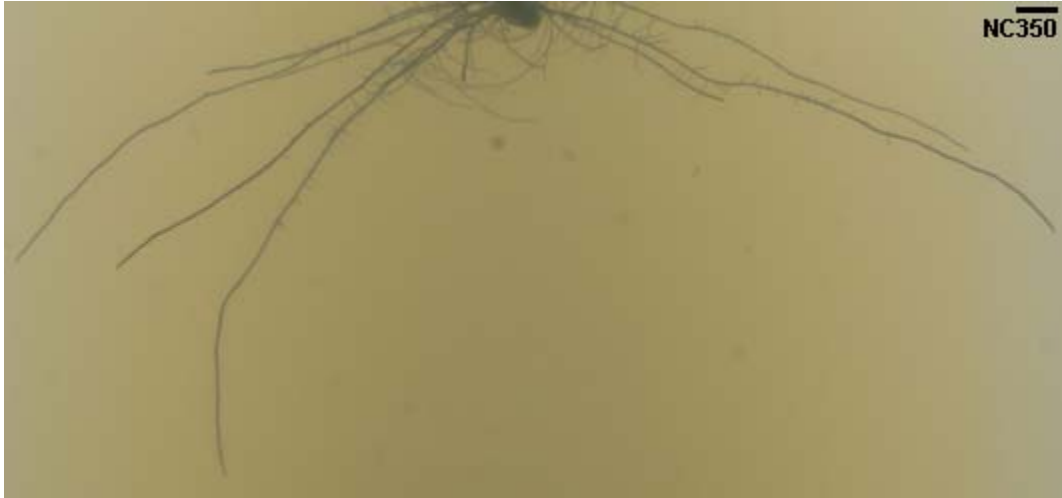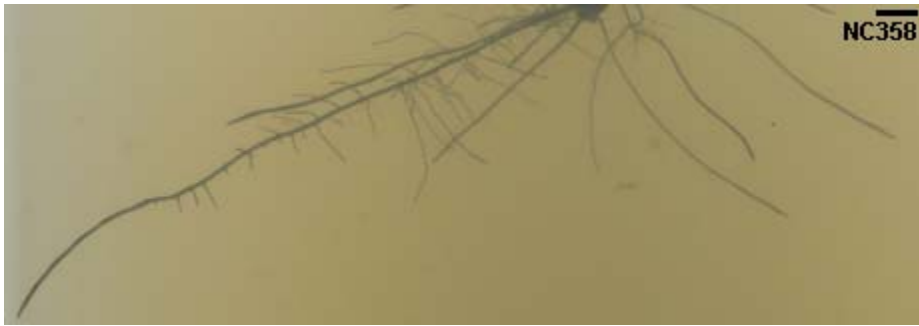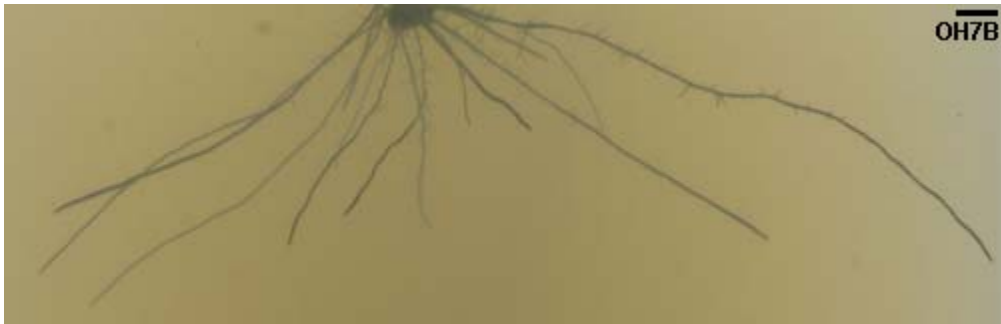



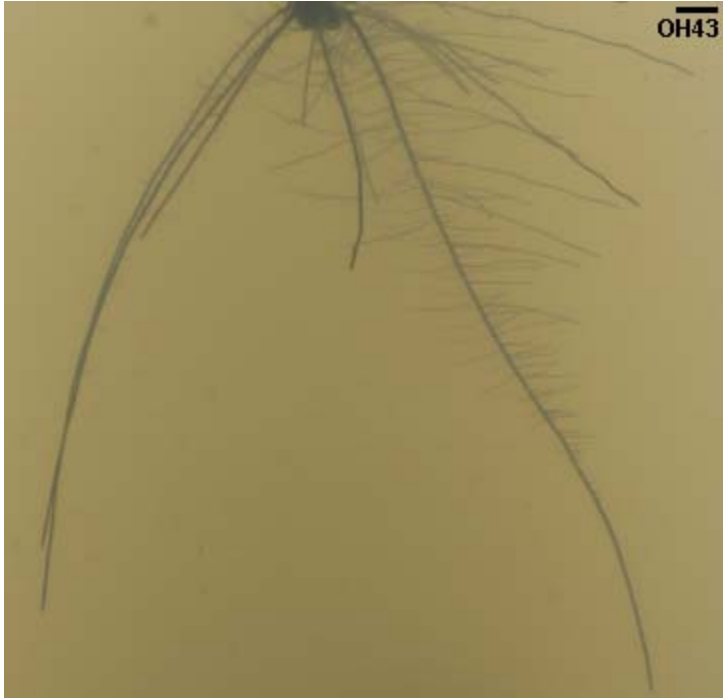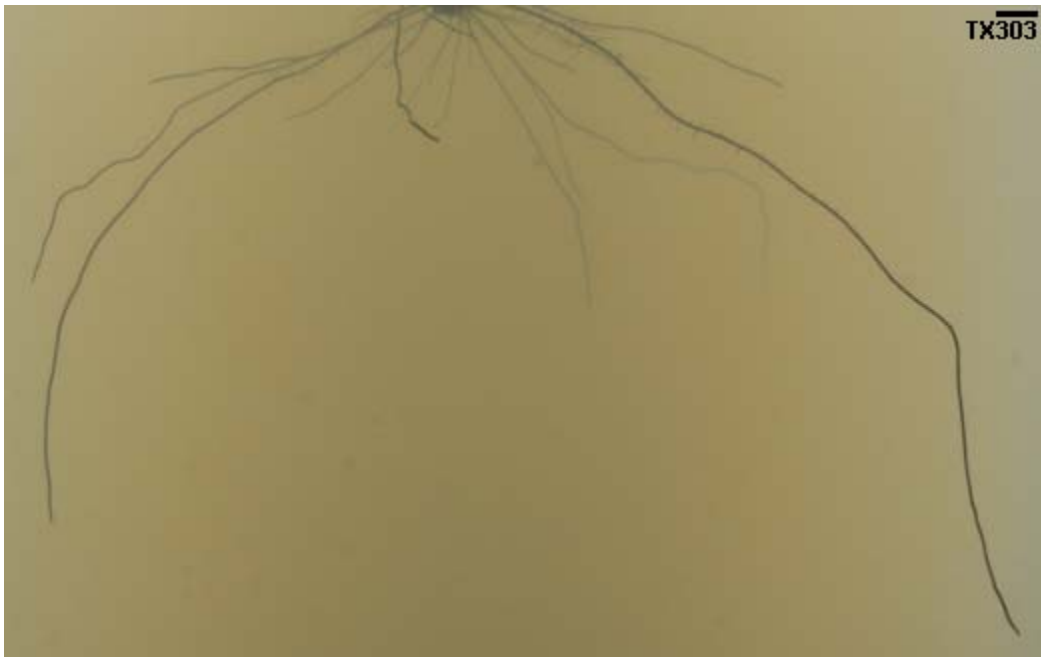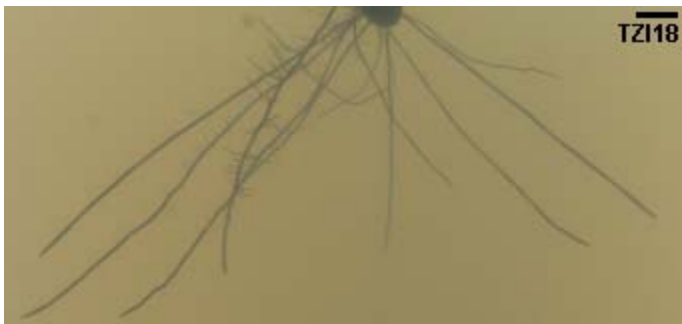



Supplemental Figure S3: Logistic regression control. To determine the predictive power of the logistic regression, the data were randomized and analyzed with 1000 permutations.

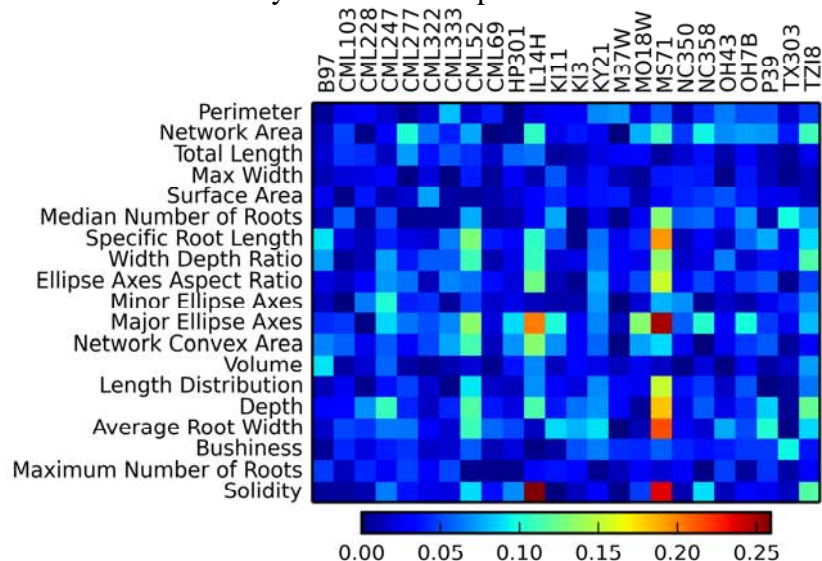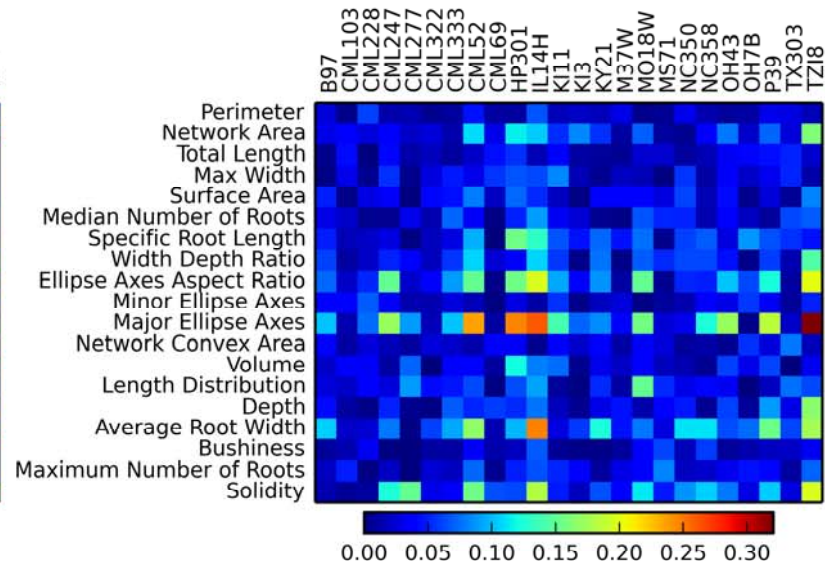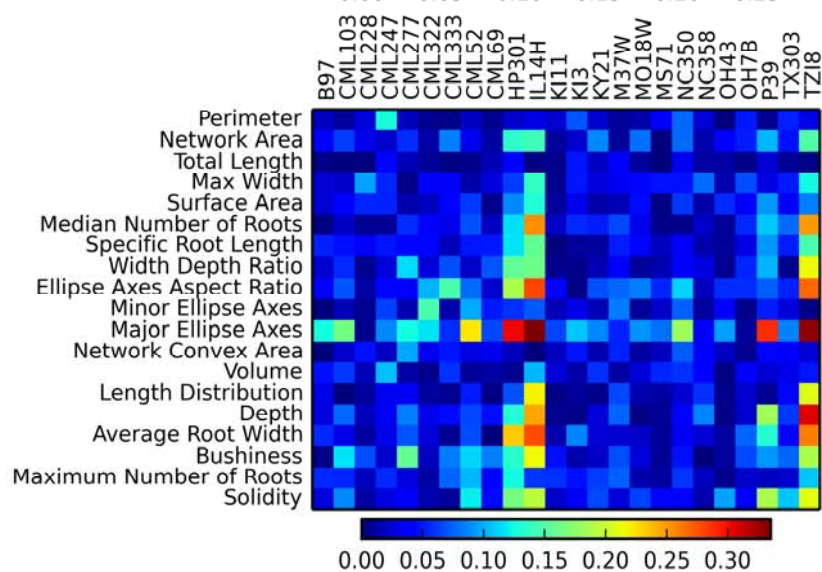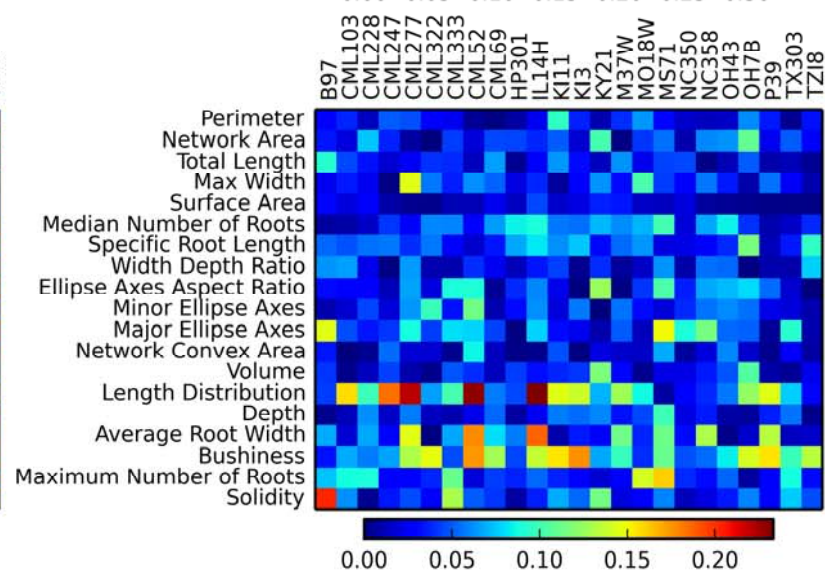

Supplemental Figure S4. Mean solidity of NAM founder lines versus imaging day for day 9. The boxes indicated the first or third quartile, while the whiskers indicated first or third quartile times 1.5 interquartile range.

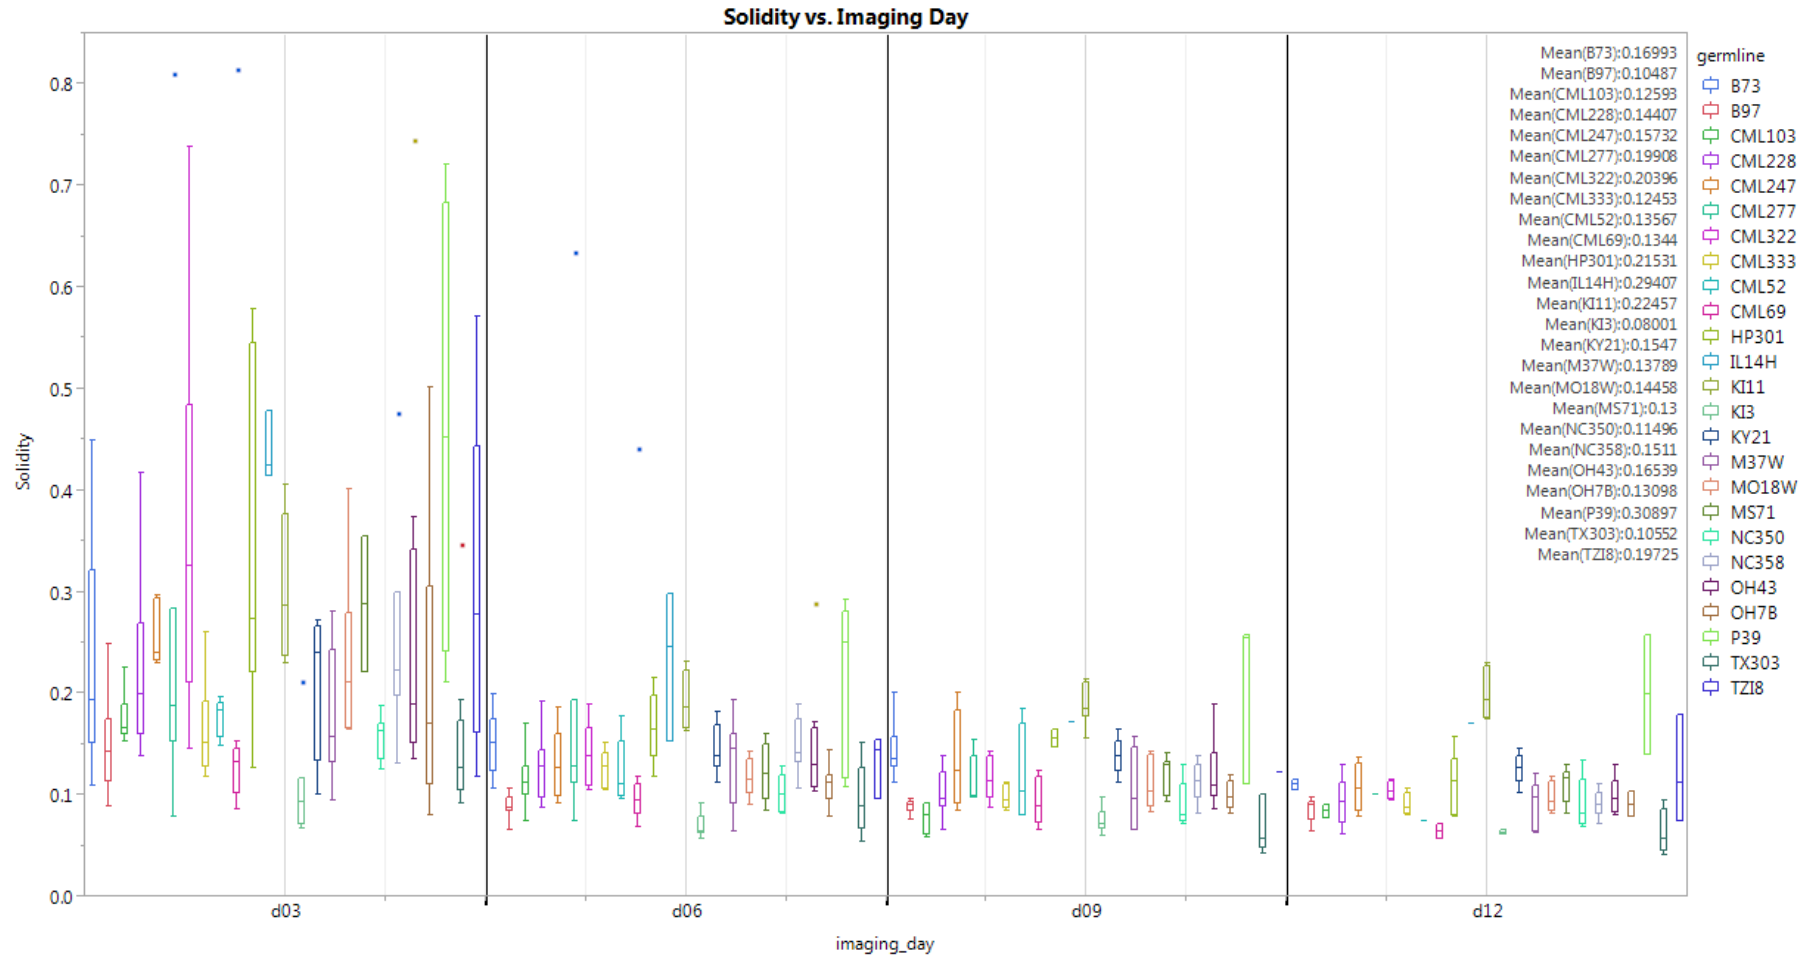

Supplemental Figure S5: Distribution of individual trait values in the B73 x Ki3 mapping population. Plot of the line represents distribution of trait values for days 4 (blue), 6 (green) and 8 (red). Vertical lines represent the average of the Ki3 and B73 parental varieties.

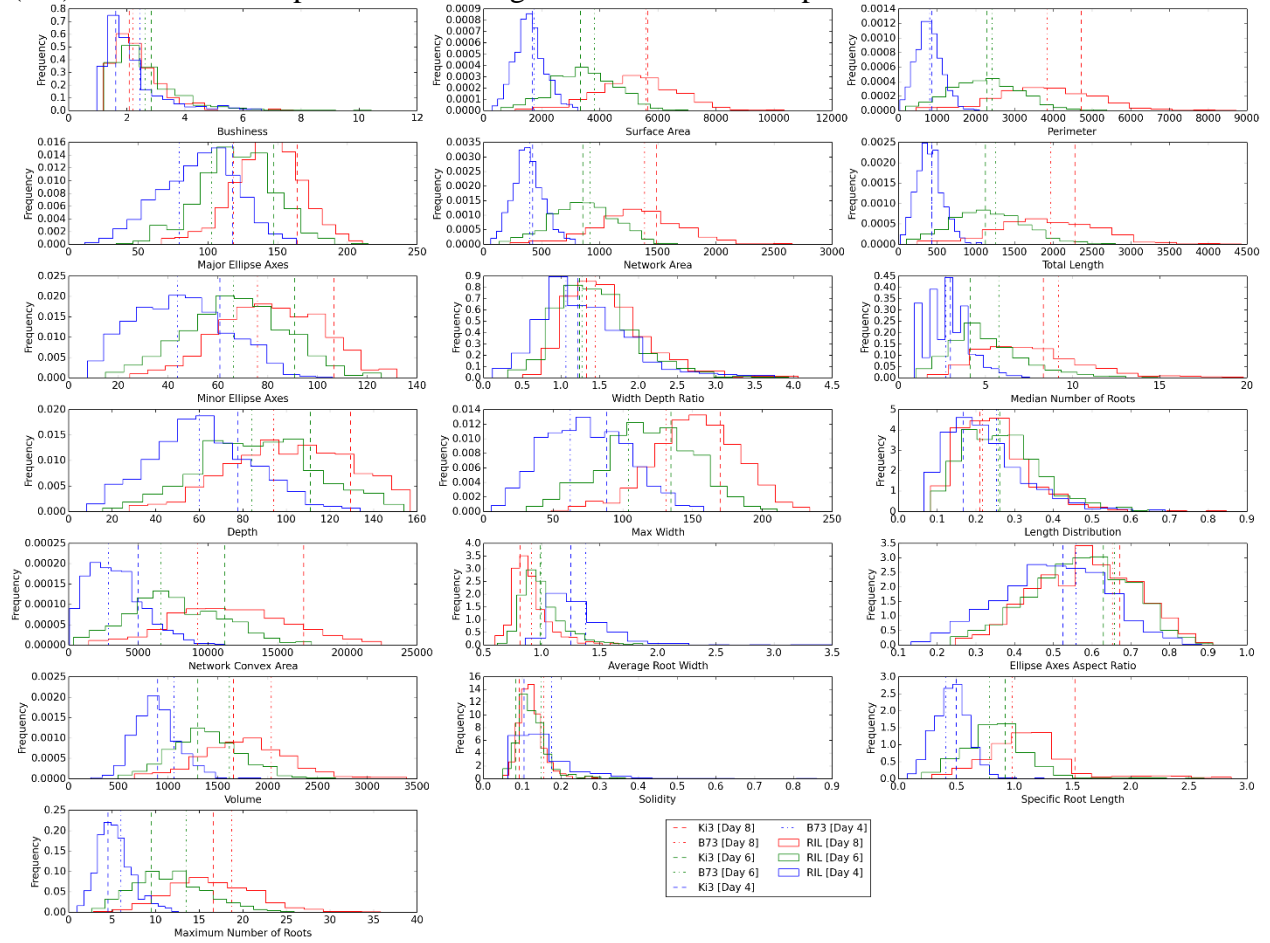

Supplemental Table S1: Trait descriptions. Adapted from (Galkovskyi et al., 2012; Topp et al., 2013)

|                                        |                                                                                                                                                                                                                 |
|----------------------------------------|-----------------------------------------------------------------------------------------------------------------------------------------------------------------------------------------------------------------|
| Minor ellipse axis (mm)                | Length of the minor axis of the best fitting ellipse to the network.                                                                                                                                            |
| Major ellipse axis (mm)                | Length of the major axis of the best fitting ellipse to the network                                                                                                                                             |
| Ellips axis ratio                      | Ratio of the minor to the major axis of best fitting ellipse.                                                                                                                                                   |
| Maximum number of roots                | Result of a vertical line sweep in which the number of roots that crossed a horizontal line was estimated, and then the 84 <sup>th</sup> percentile of all values for the extent of the network was calculated. |
| Median number of roots                 | Result of a vertical line sweep in which the number of roots that crossed a horizontal line was estimated, and then the median of all values for the extent of the network was calculated.                      |
| Network area (mm <sup>2</sup> )        | Number of network pixels in the image.                                                                                                                                                                          |
| Bushiness                              | Ratio of the maximum to the median number of roots                                                                                                                                                              |
| Network convex area (mm <sup>2</sup> ) | Area of the convex hull that encompasses the image.                                                                                                                                                             |
| Depth (mm)                             | Number of pixels in the vertical direction from the upper-most network pixel to the lower-most network pixel                                                                                                    |
| Network length (mm)                    | Total number of pixels in the network skeleton.                                                                                                                                                                 |
| Network length distribution (mm)       | The fraction of network pixels found in the lower 2/3 of the network.                                                                                                                                           |
| Perimeter (mm)                         | Total number of pixels connected to a background pixel                                                                                                                                                          |
| Solidity                               | Total network area divided by the network convex area.                                                                                                                                                          |
| Surface area (mm <sup>3</sup> )        | Sum of the local surface area at each pixel of the network skeleton, as approximated by a tubular shape whose radius is estimated from the image.                                                               |
| Volume (mm <sup>3</sup> )              | Sum of the local volume at each pixel of the network skeleton, as approximated by a tubular shape whose radius is estimated from the image.                                                                     |
| Average root width (mm)                | Mean value of the root width estimation computed for all pixels of the medial axis of the entire root system.                                                                                                   |
| Width (mm)                             | Number of pixels in the horizontal direction from the left-most network pixel to the right-most network pixel.                                                                                                  |
| Width to depth ratio                   | Value of the network width divided by the value of network depth.                                                                                                                                               |

---

|                      |                                                                                                                                                                                                                                                     |
|----------------------|-----------------------------------------------------------------------------------------------------------------------------------------------------------------------------------------------------------------------------------------------------|
| Specific root length | Total root length divided by root system volume. Volume is estimated as the sum of cross sectional areas for all pixels of the medial axis of the root system. The total root length is the number of pixels in the medial axis of the root system. |
|----------------------|-----------------------------------------------------------------------------------------------------------------------------------------------------------------------------------------------------------------------------------------------------|

---

Supplemental Table S2. Breakdown of the components for the first five principal components (vector loadings) for the PCA analysis on NAM founder lines.

|                                  | Day 3      |            |            |            |            | Day 6      |            |            |            |            |
|----------------------------------|------------|------------|------------|------------|------------|------------|------------|------------|------------|------------|
| <b>Principal Component #</b>     | <b>PC1</b> | <b>PC2</b> | <b>PC3</b> | <b>PC4</b> | <b>PC5</b> | <b>PC1</b> | <b>PC2</b> | <b>PC3</b> | <b>PC4</b> | <b>PC5</b> |
| <b>Variation Explained (%)</b>   | 51.62      | 13.64      | 9.74       | 9.40       | 5.87       | 43.98      | 15.69      | 12.10      | 10.24      | 8.58       |
| <b>Bushiness</b>                 | 0.14       | -0.69      | 0.55       | -0.32      | 0.03       | 0.09       | -0.56      | -0.39      | 0.67       | -0.01      |
| <b>Surface Area</b>              | 0.91       | 0.03       | 0.23       | 0.27       | -0.05      | 0.85       | 0.28       | 0.29       | 0.28       | 0.02       |
| <b>Perimeter</b>                 | 0.98       | 0.00       | 0.08       | -0.02      | 0.03       | 0.94       | 0.11       | 0.03       | 0.13       | 0.23       |
| <b>Major Ellipse Axes</b>        | 0.81       | -0.21      | -0.27      | 0.01       | -0.43      | 0.78       | 0.01       | -0.27      | -0.20      | -0.48      |
| <b>Network Area</b>              | 0.93       | 0.04       | 0.12       | 0.22       | -0.04      | 0.89       | 0.23       | 0.25       | 0.21       | 0.07       |
| <b>Total Length</b>              | 0.97       | -0.02      | 0.11       | 0.03       | 0.03       | 0.93       | 0.13       | 0.08       | 0.17       | 0.20       |
| <b>Minor Ellipse Axes</b>        | 0.90       | 0.11       | -0.14      | 0.21       | 0.17       | 0.84       | -0.25      | 0.27       | -0.26      | -0.16      |
| <b>Width-Depth Ratio</b>         | 0.00       | 0.70       | 0.25       | -0.40      | -0.40      | -0.08      | 0.70       | -0.54      | 0.00       | -0.29      |
| <b>Median Number of Roots</b>    | 0.42       | 0.80       | -0.03      | -0.22      | 0.12       | 0.19       | 0.82       | -0.04      | -0.26      | 0.35       |
| <b>Depth</b>                     | 0.78       | -0.42      | -0.26      | 0.28       | 0.07       | 0.80       | -0.45      | 0.27       | -0.10      | -0.09      |
| <b>Max Width</b>                 | 0.84       | 0.27       | 0.03       | -0.12      | -0.27      | 0.76       | 0.24       | -0.34      | -0.13      | -0.39      |
| <b>Length Distribution</b>       | 0.21       | -0.58      | 0.63       | -0.25      | 0.05       | 0.24       | -0.47      | -0.36      | 0.70       | -0.07      |
| <b>Average Root Width</b>        | -0.73      | 0.17       | 0.32       | 0.48       | -0.13      | -0.61      | 0.25       | 0.47       | 0.27       | -0.38      |
| <b>Network Convex Area</b>       | 0.92       | 0.04       | -0.10      | 0.14       | -0.10      | 0.91       | -0.08      | 0.07       | -0.15      | -0.27      |
| <b>Ellipse Axes Aspect Ratio</b> | 0.34       | 0.38       | 0.20       | 0.24       | 0.72       | 0.27       | -0.34      | 0.63       | -0.11      | 0.36       |
| <b>Volume</b>                    | 0.62       | 0.09       | 0.47       | 0.49       | -0.18      | 0.53       | 0.45       | 0.40       | 0.43       | -0.24      |
| <b>Solidity</b>                  | -0.81      | 0.19       | 0.29       | 0.20       | 0.03       | -0.65      | 0.36       | 0.32       | 0.36       | 0.18       |
| <b>Specific Root Length</b>      | 0.60       | -0.17      | -0.39      | -0.55      | 0.24       | 0.49       | -0.29      | -0.44      | -0.31      | 0.51       |
| <b>Maximum Number of Roots</b>   | 0.56       | 0.30       | 0.49       | -0.50      | 0.11       | 0.51       | 0.44       | -0.40      | 0.34       | 0.46       |

Vector Loadings



|                                  | Day 9      |            |            |            |            | Day 12     |            |            |            |            |
|----------------------------------|------------|------------|------------|------------|------------|------------|------------|------------|------------|------------|
| <b>Principal Component #</b>     | <b>PC1</b> | <b>PC2</b> | <b>PC3</b> | <b>PC4</b> | <b>PC5</b> | <b>PC1</b> | <b>PC2</b> | <b>PC3</b> | <b>PC4</b> | <b>PC5</b> |
| <b>Variation Explained (%)</b>   | 36.43      | 20.06      | 16.74      | 10.34      | 9.45       | 35.99      | 23.49      | 15.37      | 10.83      | 7.33       |
| <b>Bushiness</b>                 | 0.17       | -0.51      | -0.01      | 0.48       | 0.63       | 0.08       | -0.61      | -0.11      | 0.62       | 0.36       |
| <b>Surface Area</b>              | 0.70       | 0.49       | 0.48       | 0.15       | 0.04       | 0.75       | 0.60       | 0.06       | 0.11       | 0.17       |
| <b>Perimeter</b>                 | 0.88       | 0.34       | 0.04       | -0.16      | 0.23       | 0.90       | 0.24       | 0.21       | 0.23       | -0.11      |
| <b>Major Ellipse Axes</b>        | 0.73       | -0.05      | -0.41      | 0.31       | -0.38      | 0.59       | -0.45      | 0.30       | -0.45      | 0.30       |
| <b>Network Area</b>              | 0.77       | 0.44       | 0.39       | 0.05       | 0.01       | 0.82       | 0.52       | 0.06       | 0.07       | 0.08       |
| <b>Total Length</b>              | 0.86       | 0.38       | 0.11       | -0.10      | 0.24       | 0.88       | 0.30       | 0.21       | 0.26       | -0.06      |
| <b>Minor Ellipse Axes</b>        | 0.81       | -0.36      | 0.23       | -0.18      | -0.28      | 0.84       | -0.08      | -0.37      | -0.32      | -0.07      |
| <b>Width-Depth Ratio</b>         | -0.20      | 0.57       | -0.60      | 0.37       | -0.19      | -0.34      | -0.06      | 0.86       | -0.21      | 0.14       |
| <b>Median Number of Roots</b>    | -0.09      | 0.88       | -0.14      | -0.32      | -0.08      | -0.07      | 0.72       | 0.49       | -0.17      | -0.33      |
| <b>Depth</b>                     | 0.78       | -0.48      | 0.26       | -0.15      | -0.06      | 0.81       | -0.15      | -0.50      | -0.10      | 0.00       |
| <b>Max Width</b>                 | 0.70       | 0.19       | -0.41      | 0.37       | -0.32      | 0.59       | -0.29      | 0.57       | -0.35      | 0.24       |
| <b>Length Distribution</b>       | 0.27       | -0.43      | -0.04      | 0.60       | 0.54       | 0.15       | -0.60      | -0.08      | 0.61       | 0.39       |
| <b>Average Root Width</b>        | -0.50      | 0.06       | 0.63       | 0.38       | -0.36      | -0.42      | 0.59       | -0.33      | -0.28      | 0.43       |
| <b>Network Convex Area</b>       | 0.93       | -0.14      | -0.05      | 0.05       | -0.27      | 0.91       | -0.19      | -0.03      | -0.29      | 0.07       |
| <b>Ellipse Axes Aspect Ratio</b> | 0.19       | -0.35      | 0.69       | -0.45      | 0.07       | 0.44       | 0.34       | -0.69      | 0.06       | -0.29      |
| <b>Volume</b>                    | 0.20       | 0.43       | 0.71       | 0.43       | -0.05      | 0.29       | 0.79       | -0.09      | 0.07       | 0.46       |
| <b>Solidity</b>                  | -0.61      | 0.54       | 0.41       | -0.08      | 0.27       | -0.49      | 0.75       | -0.01      | 0.34       | -0.01      |
| <b>Specific Root Length</b>      | 0.49       | -0.13      | -0.60      | -0.49      | 0.26       | 0.43       | -0.58      | 0.18       | 0.20       | -0.54      |
| <b>Maximum Number of Roots</b>   | 0.26       | 0.74       | -0.20      | 0.01       | 0.52       | 0.33       | 0.31       | 0.63       | 0.57       | -0.06      |

Vector Loadings

Supplemental Table S3. Logistic regression accuracies for experimental and control conditions. For each day and each B73 x other founder pair we report accuracy of the experimental and control analysis.

| <b>Founder 1</b> | <b>Founder 2</b> | <b>Imaging Day</b> | <b>Accuracy Real</b> | <b>Accuracy Control</b> |
|------------------|------------------|--------------------|----------------------|-------------------------|
| B73              | B97              | d03                | 93.68371593          | 64.61080402             |
| B73              | B97              | d06                | 99.9995              | 68.95847704             |
| B73              | B97              | d09                | 100                  | 66.085494               |
| B73              | B97              | d12                | 100                  | 68.98175622             |
| B73              | CML103           | d03                | 96.84685857          | 64.51133076             |
| B73              | CML103           | d06                | 98.97634113          | 61.23275358             |
| B73              | CML103           | d09                | 99.92792445          | 74.8150662              |
| B73              | CML103           | d12                | 100                  | 55.64624752             |
| B73              | CML228           | d03                | 91.27583456          | 55.62142441             |
| B73              | CML228           | d06                | 98.14588195          | 61.24782836             |
| B73              | CML228           | d09                | 98.6358257           | 54.73447404             |
| B73              | CML228           | d12                | 99.5743323           | 59.68798913             |
| B73              | CML247           | d03                | 93.4286303           | 74.9619096              |
| B73              | CML247           | d06                | 94.30521656          | 74.98729253             |
| B73              | CML247           | d09                | 97.54898046          | 66.09359495             |
| B73              | CML247           | d12                | 99.58935157          | 53.26037994             |
| B73              | CML277           | d03                | 90.41725211          | 67.84518141             |
| B73              | CML277           | d06                | 95.80141665          | 69.02054075             |
| B73              | CML277           | d09                | 99.84756943          | 70.19005434             |
| B73              | CML277           | d12                | 100                  | 73.46618827             |
| B73              | CML322           | d03                | 89.16268982          | 58.49013932             |
| B73              | CML322           | d06                | 92.367748            | 66.35892825             |
| B73              | CML322           | d09                | 97.21279389          | 62.05490468             |
| B73              | CML322           | d12                | 99.99078014          | 53.34987842             |
| B73              | CML333           | d03                | 94.09571686          | 67.72894146             |
| B73              | CML333           | d06                | 95.54644112          | 71.84220439             |

|     |        |     |             |             |
|-----|--------|-----|-------------|-------------|
| B73 | CML333 | d09 | 99.41202346 | 70.3543764  |
| B73 | CML333 | d12 | 99.98435157 | 53.23135258 |
| B73 | CML52  | d03 | 97.08556608 | 74.82244077 |
| B73 | CML52  | d06 | 98.23688668 | 78.28123408 |
| B73 | CML52  | d09 | 99.08636471 | 74.87986079 |
| B73 | CML52  | d12 | 99.99625    | 73.24899691 |
| B73 | CML69  | d03 | 93.84628304 | 55.70627307 |
| B73 | CML69  | d06 | 99.51006857 | 56.56726456 |
| B73 | CML69  | d09 | 99.80888504 | 66.22727301 |
| B73 | CML69  | d12 | 100         | 55.79116832 |
| B73 | HP301  | d03 | 99.25874304 | 67.86790713 |
| B73 | HP301  | d06 | 99.94050363 | 78.2152886  |
| B73 | HP301  | d09 | 100         | 85.65350153 |
| B73 | HP301  | d12 | 100         | 59.92146351 |
| B73 | IL14H  | d03 | 99.18083795 | 83.35354648 |
| B73 | IL14H  | d06 | 99.51010859 | 85.762692   |
| B73 | IL14H  | d09 | 99.74162983 | 92.31702328 |
| B73 | IL14H  | d12 | 100         | 72.95899691 |
| B73 | KI11   | d03 | 94.55173057 | 67.8069898  |
| B73 | KI11   | d06 | 99.67553373 | 71.88432814 |
| B73 | KI11   | d09 | 99.9174665  | 62.08188562 |
| B73 | KI11   | d12 | 100         | 59.82485248 |
| B73 | KI3    | d03 | 95.51231506 | 61.52831861 |
| B73 | KI3    | d06 | 99.71037317 | 52.38084904 |
| B73 | KI3    | d09 | 99.72932449 | 61.93421053 |
| B73 | KI3    | d12 | 100         | 55.91407921 |
| B73 | KY21   | d03 | 93.13797647 | 71.19066282 |
| B73 | KY21   | d06 | 93.1476347  | 74.92349489 |
| B73 | KY21   | d09 | 95.50678516 | 66.0461896  |
| B73 | KY21   | d12 | 99.36519644 | 65.22014426 |
| B73 | M37W   | d03 | 81.44678705 | 50.06903852 |
| B73 | M37W   | d06 | 96.0515078  | 61.25153214 |

|     |       |     |             |             |
|-----|-------|-----|-------------|-------------|
| B73 | M37W  | d09 | 98.61785234 | 70.26236243 |
| B73 | M37W  | d12 | 99.28708103 | 65.04808471 |
| B73 | MO18W | d03 | 89.47588747 | 71.26578611 |
| B73 | MO18W | d06 | 97.50996437 | 74.97711712 |
| B73 | MO18W | d09 | 97.72331814 | 70.38058479 |
| B73 | MO18W | d12 | 98.14706572 | 53.42585106 |
| B73 | MS71  | d03 | 95.27398781 | 88.17886924 |
| B73 | MS71  | d06 | 96.52725561 | 66.32431334 |
| B73 | MS71  | d09 | 98.00140271 | 58.11881546 |
| B73 | MS71  | d12 | 99.18740469 | 72.44088235 |
| B73 | NC350 | d03 | 85.7964279  | 64.51841696 |
| B73 | NC350 | d06 | 95.19749741 | 71.85866747 |
| B73 | NC350 | d09 | 99.67777562 | 70.1857961  |
| B73 | NC350 | d12 | 99.86871227 | 59.47479814 |
| B73 | NC358 | d03 | 97.37530251 | 67.79971861 |
| B73 | NC358 | d06 | 98.05577246 | 71.87247026 |
| B73 | NC358 | d09 | 99.1819091  | 62.08588272 |
| B73 | NC358 | d12 | 99.83989801 | 69.11048507 |
| B73 | OH43  | d03 | 94.92908516 | 64.54961332 |
| B73 | OH43  | d06 | 96.21999889 | 69.0751207  |
| B73 | OH43  | d09 | 97.23004973 | 61.99085923 |
| B73 | OH43  | d12 | 99.96008901 | 64.64741866 |
| B73 | OH7B  | d03 | 90.58078894 | 71.25014761 |
| B73 | OH7B  | d06 | 97.55859785 | 63.8506519  |
| B73 | OH7B  | d09 | 99.70193635 | 70.33639469 |
| B73 | OH7B  | d12 | 99.94690771 | 49.10440083 |
| B73 | P39   | d03 | 97.06774688 | 67.8528927  |
| B73 | P39   | d06 | 97.11916821 | 74.98298467 |
| B73 | P39   | d09 | 99.96640975 | 79.88862569 |
| B73 | P39   | d12 | 100         | 55.90915842 |
| B73 | TX303 | d03 | 90.82933493 | 58.6423984  |
| B73 | TX303 | d06 | 98.54593833 | 61.20551457 |

|     |       |     |             |             |
|-----|-------|-----|-------------|-------------|
| B73 | TX303 | d09 | 99.96357513 | 70.37400466 |
| B73 | TX303 | d12 | 99.97722898 | 53.26781155 |
| B73 | TZI8  | d03 | 86.02802307 | 74.91613529 |
| B73 | TZI8  | d06 | 96.91653829 | 85.66179222 |
| B73 | TZI8  | d09 | 99.32524793 | 92.35030062 |
| B73 | TZI8  | d12 | 100         | 48.89353994 |

Supplemental Table S4: All of the QTLs found by the Composite Interval Mapping analysis, sorted by the effect size of the QTL.

| <b>Trait</b>                            | <b>Chromosome</b> | <b>Marker</b> | <b>LR-Score</b> | <b>Effect Size</b> | <b>Left 2-LOD</b> | <b>Left 1-LOD</b> | <b>Right 1-LOD</b> | <b>Right 2-LOD</b> |
|-----------------------------------------|-------------------|---------------|-----------------|--------------------|-------------------|-------------------|--------------------|--------------------|
| depth(mm)_d08                           | 10                | 56            | 53.282          | 0.238              | 50.521            | 55.543            | 58.532             | 60.374             |
| depth(mm)_d06                           | 10                | 56            | 49.215          | 0.189              | 50.689            | 55.554            | 61.112             | 62.154             |
| minorellipseaxes(mm)_d08                | 10                | 60            | 47.756          | -0.191             | 50.873            | 55.662            | 62.330             | 62.816             |
| minorellipseaxes(mm)_d06                | 10                | 54            | 47.670          | -0.198             | 46.776            | 46.961            | 54.805             | 55.157             |
| networkconvexarea(mm <sup>2</sup> )_d08 | 10                | 46            | 44.429          | -0.170             | 43.077            | 43.775            | 47.150             | 47.463             |
| networkconvexarea(mm <sup>2</sup> )_d06 | 10                | 46            | 43.045          | -0.176             | 43.274            | 45.212            | 46.888             | 47.369             |
| majorellipseaxes(mm)_d06                | 10                | 44            | 39.146          | 0.156              | 41.981            | 43.308            | 46.592             | 47.739             |
| lengthdistr(mm)_d06                     | 6                 | 12            | 38.571          | 0.154              | 7.144             | 9.507             | 15.321             | 15.855             |
| totallength(mm)_d08                     | 7                 | 59            | 33.272          | -0.135             | 57.369            | 58.065            | 59.706             | 64.546             |
| ellipseaxesaspectratio_d08              | 10                | 60            | 32.690          | 0.119              | 53.251            | 53.927            | 60.699             | 62.889             |
| majorellipseaxes(mm)_d08                | 10                | 46            | 32.049          | 0.121              | 42.440            | 43.721            | 47.311             | 48.075             |
| widthdeptratio_d08                      | 10                | 57            | 31.060          | 0.125              | 53.132            | 53.666            | 60.364             | 62.417             |
| solidity_d06                            | 2                 | 122           | 30.953          | 0.127              | 113.416           | 116.814           | 122.802            | 130.250            |
| ellipseaxesaspectratio_d08              | 7                 | 117           | 30.295          | 0.106              | 111.584           | 112.816           | 122.467            | 130.548            |
| widthdeptratio_d06                      | 10                | 57            | 30.047          | 0.116              | 53.603            | 55.424            | 60.056             | 61.165             |
| majorellipseaxes(mm)_d06                | 2                 | 117           | 28.604          | -0.107             | 105.470           | 113.930           | 122.030            | 127.319            |
| networkconvexarea(mm <sup>2</sup> )_d06 | 2                 | 121           | 28.235          | -0.109             | 112.246           | 115.568           | 122.227            | 122.711            |
| totallength(mm)_d06                     | 7                 | 59            | 28.088          | -0.116             | 57.298            | 58.196            | 60.806             | 65.434             |
| maximumnumberofroots_d06                | 8                 | 74            | 27.596          | 0.110              | 72.223            | 72.983            | 75.910             | 77.050             |
| lengthdistr(mm)_d08                     | 6                 | 10            | 27.256          | 0.123              | 6.884             | 9.084             | 17.326             | 17.847             |
| minorellipseaxes(mm)_d04                | 10                | 46            | 26.741          | -0.116             | 43.006            | 45.102            | 47.374             | 50.130             |
| surfacearea(mm <sup>2</sup> )_d04       | 10                | 46            | 26.441          | -0.114             | 42.756            | 45.319            | 47.242             | 47.801             |
| depth(mm)_d04                           | 10                | 46            | 26.427          | 0.108              | 43.341            | 45.330            | 51.270             | 56.062             |
| perimeter(mm)_d08                       | 7                 | 59            | 26.336          | -0.102             | 49.895            | 57.717            | 64.259             | 65.188             |
| majorellipseaxes(mm)_d08                | 3                 | 88            | 25.719          | -0.094             | 82.917            | 84.960            | 92.970             | 95.431             |
| solidity_d06                            | 10                | 57            | 25.679          | 0.105              | 46.997            | 53.776            | 62.486             | 64.760             |

|                                            |    |     |        |        |         |         |         |         |
|--------------------------------------------|----|-----|--------|--------|---------|---------|---------|---------|
| perimeter(mm)_d06                          | 7  | 59  | 25.552 | -0.106 | 57.647  | 58.399  | 60.173  | 62.907  |
| networkarea(mm <sup>2</sup> )_d04          | 10 | 46  | 25.230 | -0.106 | 44.389  | 45.347  | 47.193  | 47.672  |
| networkconvexarea(mm <sup>2</sup> )_d08    | 3  | 86  | 25.093 | -0.089 | 83.160  | 83.797  | 88.173  | 88.971  |
| ellipseaxesaspectratio_d06                 | 10 | 58  | 24.890 | 0.107  | 50.609  | 55.519  | 64.160  | 66.246  |
| minorellipseaxes(mm)_d06                   | 3  | 86  | 24.871 | -0.084 | 78.652  | 83.370  | 86.916  | 88.835  |
| majorellipseaxes(mm)_d08                   | 2  | 104 | 24.641 | -0.093 | 97.458  | 100.169 | 108.574 | 114.169 |
| solidity_d08                               | 10 | 58  | 24.386 | 0.098  | 46.813  | 50.315  | 66.105  | 66.334  |
| specificrootlength(1/mm <sup>2</sup> )_d08 | 4  | 30  | 24.352 | -0.101 | 20.645  | 21.143  | 32.081  | 33.250  |
| networkconvexarea(mm <sup>2</sup> )_d04    | 10 | 46  | 24.342 | -0.096 | 43.131  | 45.299  | 47.158  | 47.579  |
| specificrootlength(1/mm <sup>2</sup> )_d08 | 2  | 121 | 24.172 | -0.099 | 116.806 | 119.606 | 123.497 | 131.061 |
| majorellipseaxes(mm)_d04                   | 2  | 121 | 23.843 | -0.095 | 109.944 | 111.486 | 122.480 | 123.327 |
| averagerootwidth(mm)_d06                   | 2  | 121 | 23.727 | 0.096  | 116.926 | 119.368 | 122.264 | 124.338 |
| mediannumberofroots_d08                    | 2  | 85  | 23.486 | -0.109 | 82.770  | 83.759  | 88.359  | 89.172  |
| depth(mm)_d06                              | 2  | 122 | 23.478 | -0.083 | 112.580 | 118.716 | 130.848 | 131.246 |
| specificrootlength(1/mm <sup>2</sup> )_d06 | 8  | 13  | 23.144 | 0.098  | 2.622   | 11.519  | 14.492  | 15.595  |
| depth(mm)_d04                              | 2  | 121 | 22.805 | -0.093 | 112.746 | 115.913 | 122.891 | 131.200 |
| networkconvexarea(mm <sup>2</sup> )_d06    | 3  | 86  | 22.706 | -0.076 | 78.529  | 83.310  | 88.603  | 93.183  |
| averagerootwidth(mm)_d08                   | 2  | 121 | 22.516 | 0.086  | 118.230 | 119.873 | 122.541 | 131.237 |
| majorellipseaxes(mm)_d04                   | 10 | 46  | 22.505 | 0.091  | 43.677  | 45.470  | 47.397  | 51.383  |
| depth(mm)_d08                              | 2  | 128 | 22.277 | -0.085 | 119.563 | 127.293 | 130.029 | 130.923 |
| majorellipseaxes(mm)_d08                   | 1  | 68  | 22.258 | -0.081 | 56.831  | 61.579  | 71.231  | 76.078  |
| solidity_d04                               | 2  | 116 | 21.922 | 0.095  | 109.853 | 111.956 | 122.317 | 122.974 |
| surfacearea(mm <sup>2</sup> )_d06          | 10 | 46  | 21.770 | -0.091 | 42.118  | 44.886  | 47.226  | 47.811  |
| surfacearea(mm <sup>2</sup> )_d08          | 7  | 59  | 21.329 | -0.086 | 49.273  | 50.110  | 65.044  | 65.822  |
| depth(mm)_d06                              | 1  | 201 | 21.275 | -0.074 | 198.360 | 198.898 | 202.218 | 208.000 |
| volume(mm <sup>3</sup> )_d06               | 10 | 26  | 21.200 | -0.088 | 23.299  | 24.409  | 29.021  | 35.204  |
| averagerootwidth(mm)_d08                   | 4  | 31  | 21.079 | 0.081  | 22.336  | 27.308  | 33.229  | 37.380  |
| perimeter(mm)_d08                          | 4  | 30  | 20.863 | -0.079 | 19.907  | 21.714  | 31.549  | 36.414  |

|                                         |    |     |        |        |         |         |         |         |
|-----------------------------------------|----|-----|--------|--------|---------|---------|---------|---------|
| maxwidth(mm)_d06                        | 3  | 88  | 20.770 | -0.087 | 78.844  | 84.843  | 92.570  | 95.524  |
| minorellipseaxes(mm)_d06                | 2  | 121 | 20.722 | -0.071 | 109.985 | 112.643 | 122.696 | 131.249 |
| surfacearea(mm <sup>2</sup> )_d06       | 7  | 59  | 20.522 | -0.084 | 56.929  | 58.084  | 62.357  | 68.008  |
| networkconvexarea(mm <sup>2</sup> )_d04 | 2  | 116 | 20.241 | -0.077 | 109.976 | 112.094 | 122.191 | 122.792 |
| widthdepthratio_d06                     | 7  | 117 | 20.006 | -0.075 | 109.970 | 112.646 | 124.175 | 131.014 |
| majorellipseaxes(mm)_d06                | 1  | 64  | 19.874 | -0.071 | 53.811  | 59.908  | 70.671  | 73.024  |
| totallength(mm)_d04                     | 9  | 65  | 19.864 | 0.082  | 56.959  | 61.734  | 67.748  | 70.760  |
| majorellipseaxes(mm)_d06                | 3  | 88  | 19.759 | -0.071 | 78.136  | 83.292  | 92.812  | 96.208  |
| networkarea(mm <sup>2</sup> )_d08       | 7  | 59  | 19.734 | -0.079 | 49.249  | 50.015  | 64.681  | 65.654  |
| averagerootwidth(mm)_d06                | 4  | 28  | 19.722 | 0.079  | 19.457  | 23.011  | 31.394  | 36.592  |
| maximumnumberofroots_d06                | 7  | 59  | 19.710 | -0.078 | 49.059  | 58.274  | 59.893  | 68.048  |
| totallength(mm)_d08                     | 4  | 27  | 19.686 | -0.074 | 21.143  | 21.964  | 31.541  | 36.178  |
| networkarea(mm <sup>2</sup> )_d06       | 10 | 46  | 19.682 | -0.082 | 41.940  | 42.990  | 47.253  | 47.791  |
| widthdepthratio_d06                     | 10 | 91  | 19.466 | 0.072  | 80.758  | 85.725  | 93.293  | 95.868  |
| widthdepthratio_d08                     | 10 | 92  | 19.326 | 0.073  | 85.255  | 85.934  | 93.254  | 96.219  |
| widthdepthratio_d08                     | 7  | 122 | 19.243 | -0.074 | 109.629 | 111.365 | 124.641 | 131.121 |
| minorellipseaxes(mm)_d08                | 3  | 86  | 19.178 | -0.066 | 78.860  | 83.480  | 87.020  | 89.911  |
| networkarea(mm <sup>2</sup> )_d08       | 10 | 26  | 19.127 | -0.078 | 22.653  | 23.574  | 27.369  | 30.720  |
| maximumnumberofroots_d08                | 4  | 28  | 18.874 | 0.072  | 21.965  | 24.706  | 29.969  | 35.166  |
| maxwidth(mm)_d06                        | 10 | 46  | 18.757 | -0.079 | 35.666  | 39.900  | 47.082  | 47.764  |
| networkarea(mm <sup>2</sup> )_d06       | 3  | 86  | 18.665 | -0.075 | 78.769  | 83.682  | 89.321  | 93.722  |
| surfacearea(mm <sup>2</sup> )_d08       | 10 | 26  | 18.606 | -0.075 | 22.230  | 23.484  | 27.483  | 30.792  |
| maximumnumberofroots_d08                | 2  | 83  | 18.377 | -0.070 | 78.710  | 81.662  | 89.449  | 92.534  |
| solidity_d08                            | 1  | 76  | 18.261 | 0.072  | 65.493  | 65.820  | 77.459  | 85.468  |
| perimeter(mm)_d04                       | 9  | 65  | 18.153 | 0.075  | 60.528  | 61.814  | 68.925  | 70.674  |
| maximumnumberofroots_d08                | 7  | 59  | 18.087 | -0.069 | 49.528  | 56.575  | 62.060  | 66.256  |
| bushiness_d08                           | 6  | 12  | 18.072 | 0.079  | 6.629   | 6.963   | 17.711  | 21.294  |
| maxwidth(mm)_d04                        | 10 | 46  | 17.956 | -0.080 | 35.781  | 39.062  | 47.217  | 49.064  |



|                                         |    |     |        |        |         |         |         |         |
|-----------------------------------------|----|-----|--------|--------|---------|---------|---------|---------|
| averagerootwidth(mm)_d06                | 8  | 39  | 17.885 | -0.075 | 33.240  | 33.877  | 46.081  | 46.392  |
| networkconvexarea(mm <sup>2</sup> )_d08 | 9  | 54  | 17.863 | 0.062  | 48.821  | 51.905  | 54.792  | 55.877  |
| volume(mm <sup>3</sup> )_d06            | 9  | 37  | 17.792 | 0.073  | 30.831  | 31.644  | 39.637  | 46.239  |
| majorellipseaxes(mm)_d08                | 5  | 29  | 17.634 | 0.064  | 26.806  | 28.367  | 32.221  | 37.247  |
| maximumnumberofroots_d06                | 9  | 64  | 17.338 | 0.067  | 60.503  | 60.805  | 74.781  | 80.046  |
| bushiness_d06                           | 6  | 21  | 17.190 | 0.077  | 1.549   | 1.856   | 21.281  | 21.556  |
| solidity_d08                            | 3  | 96  | 17.126 | 0.066  | 85.636  | 95.040  | 99.285  | 101.040 |
| networkconvexarea(mm <sup>2</sup> )_d06 | 9  | 54  | 16.991 | 0.064  | 47.764  | 51.845  | 54.667  | 58.227  |
| bushiness_d04                           | 1  | 0   | 16.940 | 0.075  | 0.000   | 0.000   | 3.589   | 6.799   |
| mediannumberofroots_d04                 | 9  | 64  | 16.935 | 0.076  | 58.192  | 58.853  | 69.114  | 69.967  |
| minorellipseaxes(mm)_d04                | 9  | 34  | 16.746 | 0.064  | 31.063  | 31.669  | 39.189  | 40.395  |
| networkarea(mm <sup>2</sup> )_d06       | 7  | 60  | 16.733 | -0.067 | 48.966  | 57.745  | 65.750  | 68.288  |
| solidity_d04                            | 10 | 46  | 16.656 | 0.070  | 37.823  | 45.197  | 48.278  | 51.834  |
| totallength(mm)_d06                     | 3  | 88  | 16.438 | -0.059 | 79.589  | 85.035  | 92.569  | 94.742  |
| minorellipseaxes(mm)_d06                | 9  | 54  | 16.287 | 0.055  | 47.750  | 51.790  | 57.012  | 62.338  |
| averagerootwidth(mm)_d08                | 8  | 38  | 16.239 | -0.063 | 33.134  | 33.780  | 39.890  | 46.361  |
| averagerootwidth(mm)_d04                | 9  | 64  | 16.021 | -0.069 | 57.639  | 60.682  | 67.933  | 70.971  |
| totallength(mm)_d06                     | 9  | 64  | 15.931 | 0.062  | 54.863  | 61.247  | 67.367  | 70.992  |
| lengthdistr(mm)_d06                     | 1  | 191 | 15.830 | -0.074 | 182.788 | 185.765 | 199.259 | 200.392 |
| depth(mm)_d04                           | 7  | 107 | 15.545 | 0.062  | 96.418  | 105.858 | 108.850 | 117.296 |
